# Supplementary material
Source: HighWire-hosted journal article supplement (https://thorax.bmj.com/content/72/10/912)
Supplement: inline-supplementary-material-2 [file inline-supplementary-material-2.pdf]

**Supplementary Table II. Baseline comparison of smokers who did/did not complete T<sub>2</sub> questionnaires**

|                                                    |                             | <b>T<sub>2</sub> completers<br/>(n=865)<br/>n (%) or mean (SD)</b> | <b>T<sub>2</sub> non-completers<br/>(n=661)<sup>‡</sup><br/>n (%) or mean (SD)</b> | <b>P value</b> |
|----------------------------------------------------|-----------------------------|--------------------------------------------------------------------|------------------------------------------------------------------------------------|----------------|
| <b>Trial allocation</b>                            | Intervention                | 488 (56%)                                                          | 263 (40%)                                                                          | <0.001         |
|                                                    | Control                     | 377 (44%)                                                          | 398 (60%)                                                                          |                |
| <b>Site</b>                                        | Liverpool                   | 445 (51%)                                                          | 397 (60%)                                                                          | <0.001         |
|                                                    | Cambridge                   | 420 (49%)                                                          | 264 (40%)                                                                          |                |
| <b>Age</b>                                         | Up to 65 years              | 341 (39%)                                                          | 270 (41%)                                                                          | 0.69           |
|                                                    | 66 – 70 years               | 379 (44%)                                                          | 275 (42%)                                                                          |                |
|                                                    | Over 70 years               | 145 (17%)                                                          | 116 (18%)                                                                          |                |
| <b>Gender</b>                                      | Male                        | 608 (70%)                                                          | 463 (70%)                                                                          | 0.92           |
|                                                    | Female                      | 257 (30%)                                                          | 198 (30%)                                                                          |                |
| <b>Marital group</b>                               | Married/cohabiting          | 593 (69%)                                                          | 420 (64%)                                                                          | 0.05           |
|                                                    | Not married/cohabiting      | 271 (31%)                                                          | 239 (36%)                                                                          |                |
| <b>IMD</b>                                         | Quintile 1 (most deprived)  | 269 (31%)                                                          | 252 (38%)                                                                          | <0.01          |
|                                                    | Quintile 2                  | 108 (12%)                                                          | 80 (12%)                                                                           |                |
|                                                    | Quintile 3                  | 133 (15%)                                                          | 119 (18%)                                                                          |                |
|                                                    | Quintile 4                  | 149 (17%)                                                          | 92 (14%)                                                                           |                |
|                                                    | Quintile 5 (least deprived) | 206 (24%)                                                          | 118 (18%)                                                                          |                |
| <b>Lung cancer experience</b>                      | No                          | 520 (60%)                                                          | 342 (52%)                                                                          | <0.001         |
|                                                    | Yes                         | 342 (40%)                                                          | 316 (48%)                                                                          |                |
| <b>Cancer distress (T<sub>0</sub>)<sup>†</sup></b> |                             | 2.26 (0.28)<br><i>9.58</i>                                         | 2.24 (0.33)<br><i>9.39</i>                                                         | 0.40           |

Note: percentages were calculated based on available data.

<sup>‡</sup> Non-completers included non-responders and ineligible responders.

<sup>†</sup> Log<sub>n</sub> scores in normal text, original scores in italics (analyses performed using log<sub>n</sub> scores).
